# Supplementary material for: Promoter Analysis Reveals Globally Differential Regulation of Human Long Non-Coding RNA and Protein-Coding Genes
Source: PLOS journal article supplement (doi:10.1371/journal.pone.0109443), 2014-10-02
Supplement: S2 (10.1371/journal.pone.0109443.s002) [file journal.pone.0109443.s002]

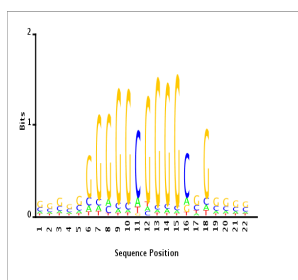

DMF191

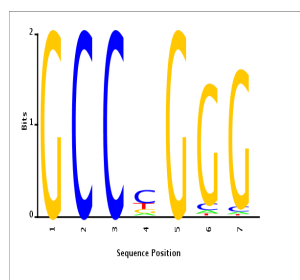

DMF840

a: Logos for over-represented *ab initio* motifs from promoters of protein-coding genes in complete promoter set(CPS)

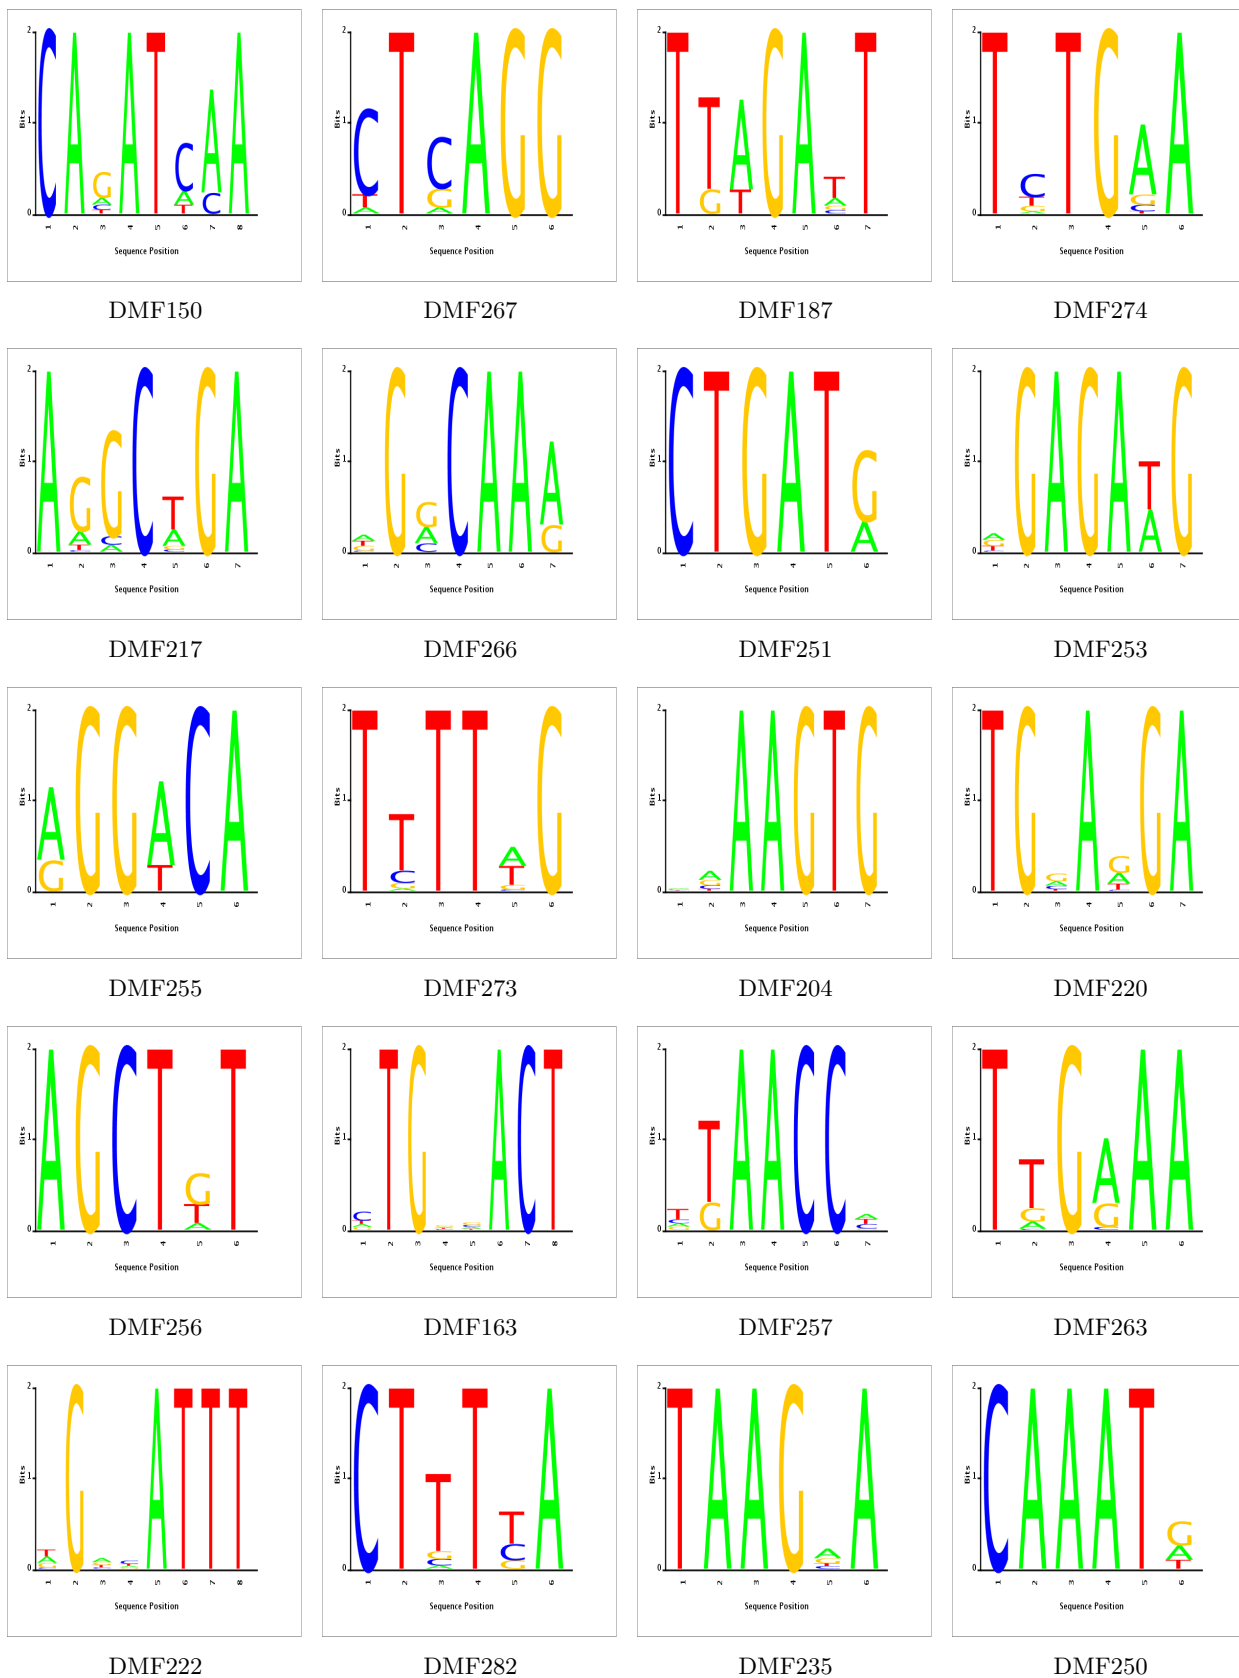

b: Logos for over-represented *ab initio* motifs from promoters of lncRNA genes in complete promoter set(CPS) (cont..)

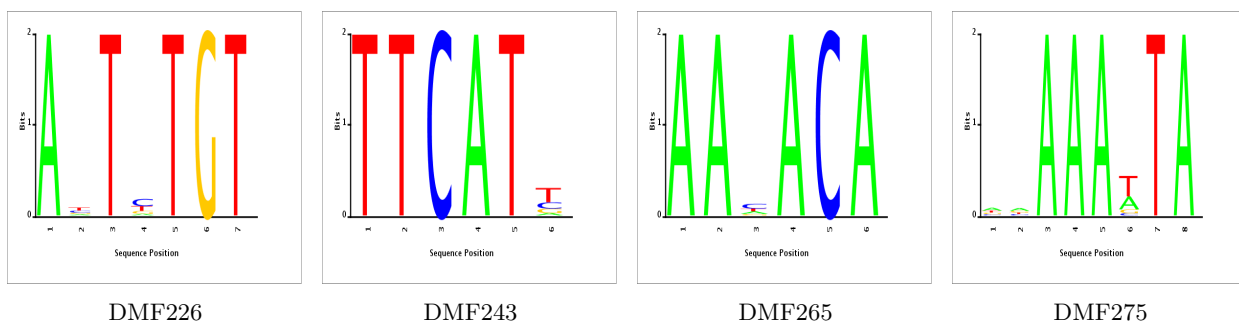

b: Logos for over-represented *ab initio* motifs from promoters of lncRNA genes in complete promoter set(CPS)

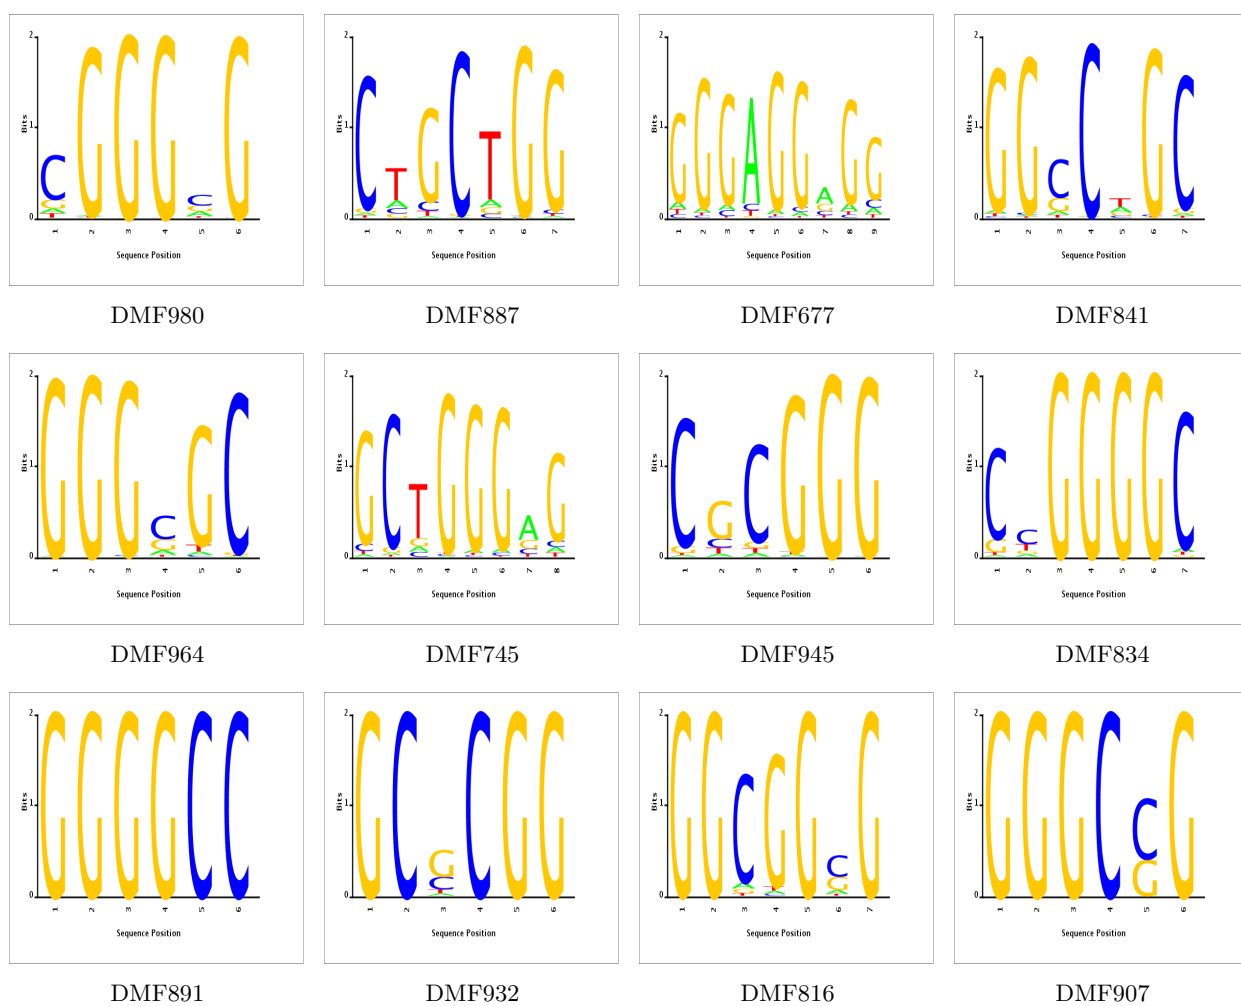

c: Logos for over-represented *ab initio* motifs from promoters of protein-coding genes in repeat-filtered promoter set(REFPS)

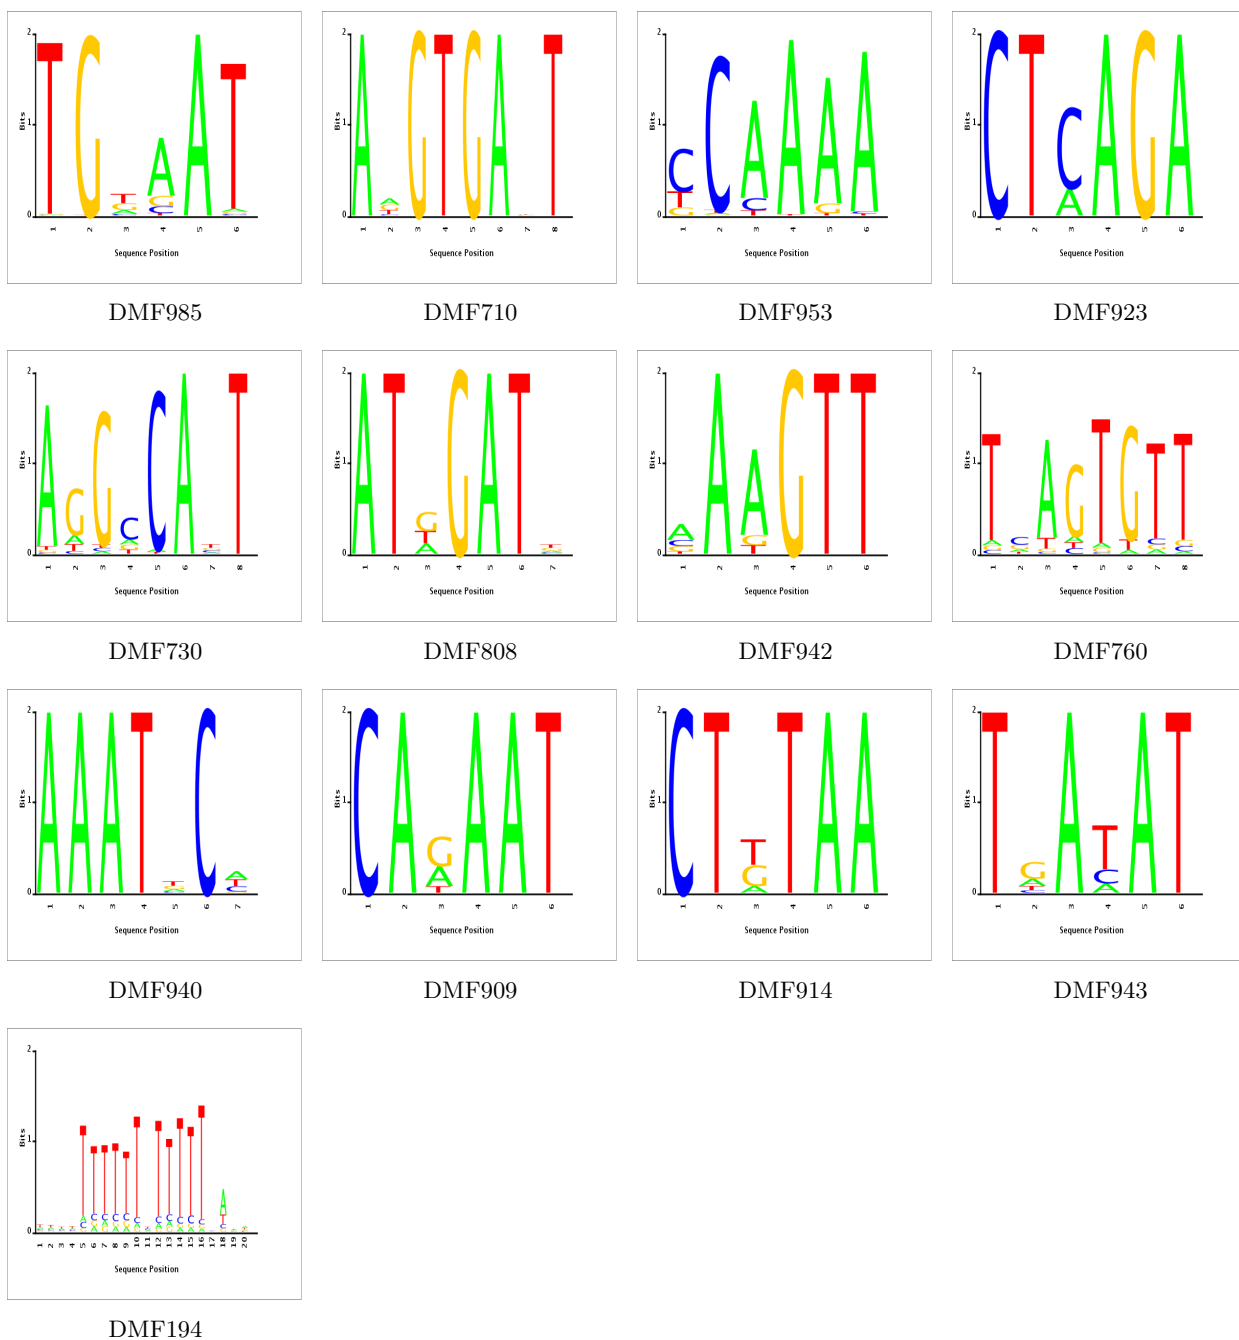

d: Logos for over-represented *ab initio* motifs from promoters of lncRNA genes in repeat-filtered promoter set(REFPS)

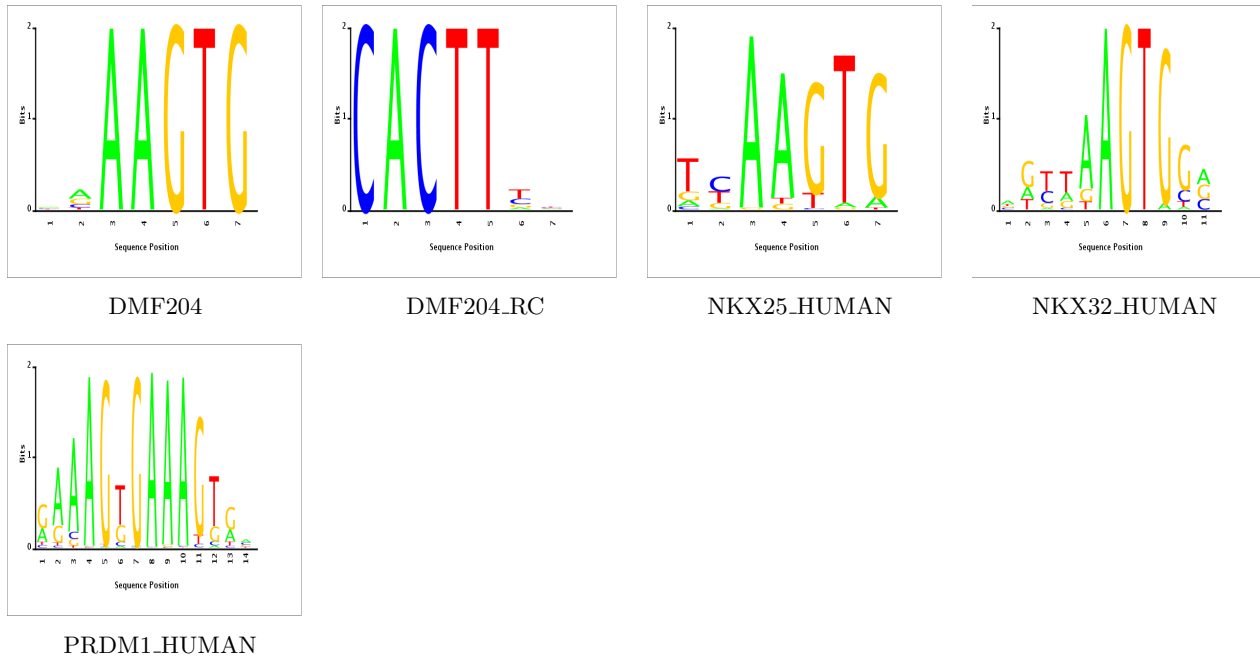

e: Known TFBS match with *ab initio* motifs from promoters of long non-coding RNA(lncRNA) genes in complete promoter set(CPS)

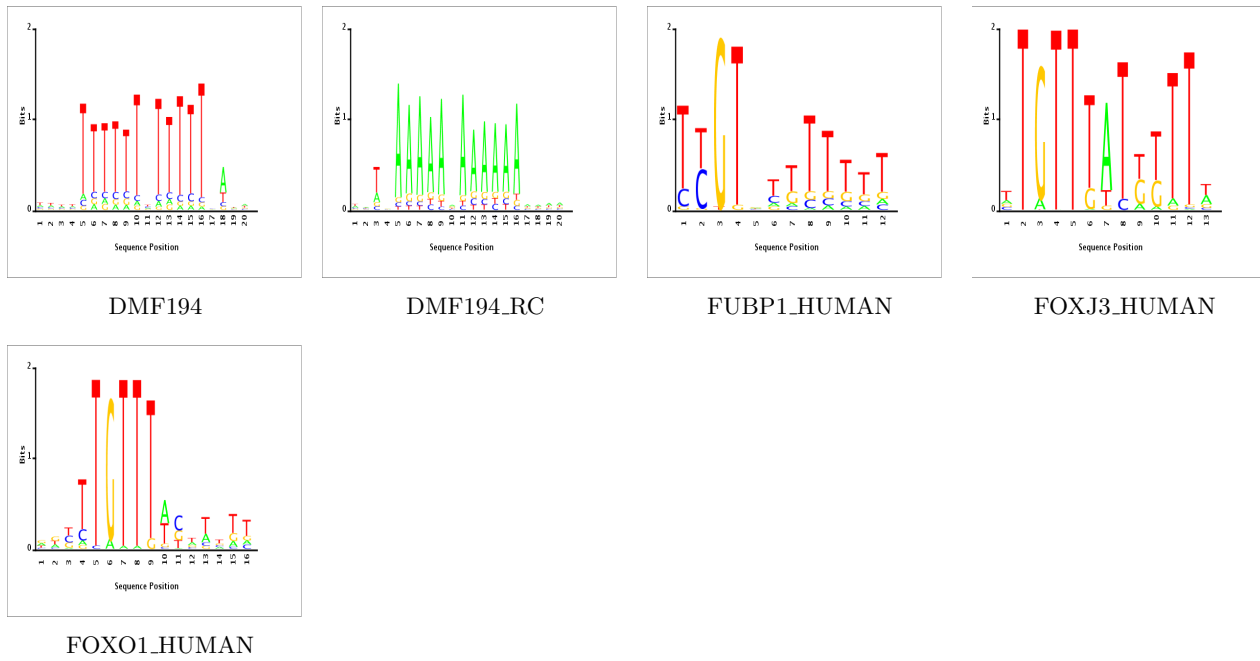

f: Known TFBS match with *ab initio* motifs from promoters of long non-coding RNA(lncRNA) genes in repeat-filtered promoter set(REFPS)

Fig. S2. Logos for over-represented *ab initio* motif families (MFs) from promoters of: a) protein-coding genes in CPS b) lncRNA genes in CPS c) protein-coding genes in REFPS d) lncRNA genes in REFPS. Logos for *ab initio* motif families (MFs), corresponding reverse complement(RC) MF and known TFBS match by TOMTOM system from promoters of: e) lncRNA genes in CPS f) lncRNA genes in REFPS.
