# Supplementary material for: Promoter Analysis Reveals Globally Differential Regulation of Human Long Non-Coding RNA and Protein-Coding Genes
Source: PLOS journal article supplement (doi:10.1371/journal.pone.0109443), 2014-10-02
Supplement: S7 (10.1371/journal.pone.0109443.s007) [file journal.pone.0109443.s007.pdf]

Table S1. Mono-, di-, and tri-nucleotides frequency and observed/expected ratio for both complete promoter set (CPS) and repeat-filtered promoter set (REFPS).

Obs/Exp (di) = observed to expected ration of dinucleotides. Expected number is estimated form the assumption of independent nucleotide distribution  
 Obs/Exp (tri) = observed to expected ration of trinucleotides. Expected number is estimated form the assumption of independent nucleotide distribution  
 Upstream region = [-1000..0]  
 Downstream regions = [0..1000]

| Complete promoter set (CPS) |                        |                    |                |                  |                    |                 |                       |                    |             |                        |                    |                |                  |                        |                 |                  |                    |             |                        |                    |                |                  |                    |                 |                  |                    |
|-----------------------------|------------------------|--------------------|----------------|------------------|--------------------|-----------------|-----------------------|--------------------|-------------|------------------------|--------------------|----------------|------------------|------------------------|-----------------|------------------|--------------------|-------------|------------------------|--------------------|----------------|------------------|--------------------|-----------------|------------------|--------------------|
| Protein-coding genes        |                        |                    |                |                  |                    |                 | Long non-coding genes |                    |             |                        |                    |                |                  | Coding/noncoding ratio |                 |                  |                    |             |                        |                    |                |                  |                    |                 |                  |                    |
| Nucleotides                 | Nucleotide probability |                    | Di-nucleotides | Obs/Exp (di)     |                    | Tri-nucleotides | Obs/Exp (tri)         |                    | Nucleotides | Nucleotide probability |                    | Di-nucleotides | Obs/Exp (di)     |                        | Tri-nucleotides | Obs/Exp (tri)    |                    | Nucleotides | Nucleotide probability |                    | Di-nucleotides | Obs/Exp (di)     |                    | Tri-nucleotides | Obs/Exp (tri)    |                    |
|                             | Up-stream region       | Down-stream region |                | Up-stream region | Down-stream region |                 | Up-stream region      | Down-stream region |             | Up-stream region       | Down-stream region |                | Up-stream region | Down-stream region     |                 | Up-stream region | Down-stream region |             | Up-stream region       | Down-stream region |                | Up-stream region | Down-stream region |                 | Up-stream region | Down-stream region |
| A                           | 0.238                  | 0.203              | AA             | 1.236            | 1.241              | AAA             | 1.912                 | 1.943              | A           | 0.2674                 | 0.2662             | AA             | 1.158            | 1.146                  | AAA             | 1.629            | 1.570              | A           | 0.891                  | 0.761              | AA             | 1.068            | 1.083              | AAA             | 1.173            | 1.238              |
| C                           | 0.264                  | 0.275              | AC             | 0.766            | 0.754              | AAC             | 0.805                 | 0.822              | C           | 0.2361                 | 0.2309             | AC             | 0.799            | 0.806                  | AAC             | 0.792            | 0.801              | C           | 1.120                  | 1.192              | AC             | 0.958            | 0.935              | AAC             | 1.017            | 1.026              |
| G                           | 0.263                  | 0.298              | AG             | 1.154            | 1.180              | AAG             | 1.165                 | 1.248              | G           | 0.2322                 | 0.2367             | AG             | 1.162            | 1.174                  | AAG             | 1.132            | 1.164              | G           | 1.131                  | 1.260              | AG             | 0.993            | 1.005              | AAG             | 1.029            | 1.073              |
| T                           | 0.235                  | 0.224              | AT             | 0.849            | 0.839              | AAT             | 1.114                 | 1.104              | T           | 0.2642                 | 0.2663             | AT             | 0.874            | 0.863                  | AAT             | 1.028            | 1.000              | T           | 0.888                  | 0.842              | AT             | 0.971            | 0.972              | AAT             | 1.083            | 1.104              |
|                             |                        |                    | CA             | 1.059            | 1.038              | ACA             | 1.018                 | 0.988              |             |                        |                    | CA             | 1.153            | 1.166                  | ACA             | 1.098            | 1.107              |             |                        |                    | CA             | 0.919            | 0.890              | ACA             | 0.928            | 0.892              |
|                             |                        |                    | CC             | 1.216            | 1.197              | ACC             | 0.812                 | 0.857              |             |                        |                    | CC             | 1.235            | 1.236                  | ACC             | 0.872            | 0.893              |             |                        |                    | CC             | 0.985            | 0.969              | ACC             | 0.932            | 0.959              |
|                             |                        |                    | CG             | 0.587            | 0.647              | ACG             | 0.368                 | 0.385              |             |                        |                    | CG             | 0.400            | 0.377                  | ACG             | 0.275            | 0.274              |             |                        |                    | CG             | 1.467            | 1.716              | ACG             | 1.340            | 1.405              |
|                             |                        |                    | CT             | 1.152            | 1.191              | ACT             | 0.900                 | 0.903              |             |                        |                    | CT             | 1.158            | 1.180                  | ACT             | 0.889            | 0.899              |             |                        |                    | CT             | 0.995            | 1.009              | ACT             | 1.012            | 1.005              |
|                             |                        |                    | GA             | 0.960            | 1.024              | AGA             | 1.246                 | 1.379              |             |                        |                    | GA             | 0.965            | 0.985                  | AGA             | 1.241            | 1.271              |             |                        |                    | GA             | 0.995            | 1.039              | AGA             | 1.004            | 1.085              |
|                             |                        |                    | GC             | 1.016            | 1.010              | AGC             | 1.063                 | 1.107              |             |                        |                    | GC             | 1.024            | 1.008                  | AGC             | 1.111            | 1.122              |             |                        |                    | GC             | 0.992            | 1.002              | AGC             | 0.957            | 0.987              |
|                             |                        |                    | GG             | 1.223            | 1.153              | AGG             | 1.392                 | 1.311              |             |                        |                    | GG             | 1.244            | 1.229                  | AGG             | 1.435            | 1.439              |             |                        |                    | GG             | 0.983            | 0.938              | AGG             | 0.970            | 0.911              |
|                             |                        |                    | GT             | 0.769            | 0.760              | AGT             | 0.892                 | 0.912              |             |                        |                    | GT             | 0.796            | 0.802                  | AGT             | 0.884            | 0.885              |             |                        |                    | GT             | 0.966            | 0.947              | AGT             | 1.009            | 1.031              |
|                             |                        |                    | TA             | 0.733            | 0.697              | ATA             | 0.787                 | 0.747              |             |                        |                    | TA             | 0.731            | 0.720                  | ATA             | 0.790            | 0.758              |             |                        |                    | TA             | 1.004            | 0.968              | ATA             | 0.996            | 0.985              |
|                             |                        |                    | TC             | 0.972            | 0.964              | ATC             | 0.689                 | 0.710              |             |                        |                    | TC             | 0.969            | 0.979                  | ATC             | 0.708            | 0.721              |             |                        |                    | TC             | 1.004            | 0.985              | ATC             | 0.974            | 0.984              |
|                             |                        |                    | TG             | 1.056            | 1.062              | ATG             | 0.816                 | 0.817              |             |                        |                    | TG             | 1.154            | 1.158                  | ATG             | 0.956            | 0.954              |             |                        |                    | TG             | 0.915            | 0.917              | ATG             | 0.854            | 0.856              |
|                             |                        |                    | TT             | 1.236            | 1.229              | ATT             | 1.125                 | 1.105              |             |                        |                    | TT             | 1.162            | 1.154                  | ATT             | 1.031            | 1.008              |             |                        |                    | TT             | 1.064            | 1.066              | ATT             | 1.092            | 1.096              |
|                             |                        |                    | CAA            |                  |                    | CAA             | 0.982                 | 0.948              |             |                        |                    | CAA            |                  |                        | CAA             | 1.005            | 1.006              |             |                        |                    | CAA            |                  |                    | CAA             | 0.977            | 0.942              |
|                             |                        |                    | CAC            |                  |                    | CAC             | 0.990                 | 0.886              |             |                        |                    | CAC            |                  |                        | CAC             | 1.132            | 1.136              |             |                        |                    | CAC            |                  |                    | CAC             | 0.874            | 0.780              |
|                             |                        |                    | CAG            |                  |                    | CAG             | 1.416                 | 1.386              |             |                        |                    | CAG            |                  |                        | CAG             | 1.576            | 1.609              |             |                        |                    | CAG            |                  |                    | CAG             | 0.898            | 0.861              |
|                             |                        |                    | CAT            |                  |                    | CAT             | 0.811                 | 0.836              |             |                        |                    | CAT            |                  |                        | CAT             | 0.943            | 0.953              |             |                        |                    | CAT            |                  |                    | CAT             | 0.860            | 0.877              |
|                             |                        |                    | CCA            |                  |                    | CCA             | 1.224                 | 1.196              |             |                        |                    | CCA            |                  |                        | CCA             | 1.368            | 1.403              |             |                        |                    | CCA            |                  |                    | CCA             | 0.895            | 0.852              |
|                             |                        |                    | CCC            |                  |                    | CCC             | 1.502                 | 1.425              |             |                        |                    | CCC            |                  |                        | CCC             | 1.540            | 1.523              |             |                        |                    | CCC            |                  |                    | CCC             | 0.975            | 0.936              |
|                             |                        |                    | CCG            |                  |                    | CCG             | 0.768                 | 0.834              |             |                        |                    | CCG            |                  |                        | CCG             | 0.575            | 0.527              |             |                        |                    | CCG            |                  |                    | CCG             | 1.336            | 1.584              |
|                             |                        |                    | CCT            |                  |                    | CCT             | 1.377                 | 1.396              |             |                        |                    | CCT            |                  |                        | CCT             | 1.402            | 1.445              |             |                        |                    | CCT            |                  |                    | CCT             | 0.982            | 0.966              |
|                             |                        |                    | CGA            |                  |                    | CGA             | 0.377                 | 0.453              |             |                        |                    | CGA            |                  |                        | CGA             | 0.255            | 0.255              |             |                        |                    | CGA            |                  |                    | CGA             | 1.479            | 1.777              |
|                             |                        |                    | CGC            |                  |                    | CGC             | 0.789                 | 0.796              |             |                        |                    | CGC            |                  |                        | CGC             | 0.550            | 0.482              |             |                        |                    | CGC            |                  |                    | CGC             | 1.435            | 1.652              |
|                             |                        |                    | CGG            |                  |                    | CGG             | 0.770                 | 0.833              |             |                        |                    | CGG            |                  |                        | CGG             | 0.563            | 0.527              |             |                        |                    | CGG            |                  |                    | CGG             | 1.368            | 1.580              |
|                             |                        |                    | CGT            |                  |                    | CGT             | 0.364                 | 0.388              |             |                        |                    | CGT            |                  |                        | CGT             | 0.268            | 0.273              |             |                        |                    | CGT            |                  |                    | CGT             | 1.357            | 1.424              |
|                             |                        |                    | CTA            |                  |                    | CTA             | 0.662                 | 0.630              |             |                        |                    | CTA            |                  |                        | CTA             | 0.666            | 0.664              |             |                        |                    | CTA            |                  |                    | CTA             | 0.995            | 0.948              |
|                             |                        |                    | CTC            |                  |                    | CTC             | 1.339                 | 1.288              |             |                        |                    | CTC            |                  |                        | CTC             | 1.346            | 1.366              |             |                        |                    | CTC            |                  |                    | CTC             | 0.995            | 0.943              |
|                             |                        |                    | CTG            |                  |                    | CTG             | 1.400                 | 1.443              |             |                        |                    | CTG            |                  |                        | CTG             | 1.573            | 1.607              |             |                        |                    | CTG            |                  |                    | CTG             | 0.890            | 0.898              |
|                             |                        |                    | CTT            |                  |                    | CTT             | 1.157                 | 1.237              |             |                        |                    | CTT            |                  |                        | CTT             | 1.121            | 1.152              |             |                        |                    | CTT            |                  |                    | CTT             | 1.032            | 1.074              |
|                             |                        |                    | GAA            |                  |                    | GAA             | 1.120                 | 1.233              |             |                        |                    | GAA            |                  |                        | GAA             | 1.101            | 1.131              |             |                        |                    | GAA            |                  |                    | GAA             | 1.018            | 1.090              |
|                             |                        |                    | GAC            |                  |                    | GAC             | 0.694                 | 0.747              |             |                        |                    | GAC            |                  |                        | GAC             | 0.724            | 0.748              |             |                        |                    | GAC            |                  |                    | GAC             | 0.959            | 0.999              |
|                             |                        |                    | GAG            |                  |                    | GAG             | 1.322                 | 1.371              |             |                        |                    | GAG            |                  |                        | GAG             | 1.336            | 1.349              |             |                        |                    | GAG            |                  |                    | GAG             | 0.989            | 1.016              |
|                             |                        |                    | GAT            |                  |                    | GAT             | 0.689                 | 0.707              |             |                        |                    | GAT            |                  |                        | GAT             | 0.712            | 0.716              |             |                        |                    | GAT            |                  |                    | GAT             | 0.968            | 0.988              |
|                             |                        |                    | GCA            |                  |                    | GCA             | 0.957                 | 0.942              |             |                        |                    | GCA            |                  |                        | GCA             | 1.079            | 1.087              |             |                        |                    | GCA            |                  |                    | GCA             | 0.888            | 0.866              |
|                             |                        |                    | GCC            |                  |                    | GCC             | 1.260                 | 1.196              |             |                        |                    | GCC            |                  |                        | GCC             | 1.345            | 1.318              |             |                        |                    | GCC            |                  |                    | GCC             | 0.937            | 0.907              |
|                             |                        |                    | GCG            |                  |                    | GCG             | 0.790                 | 0.812              |             |                        |                    | GCG            |                  |                        | GCG             | 0.530            | 0.481              |             |                        |                    | GCG            |                  |                    | GCG             | 1.489            | 1.687              |
|                             |                        |                    | GCT            |                  |                    | GCT             | 1.047                 | 1.104              |             |                        |                    | GCT            |                  |                        | GCT             | 1.111            | 1.124              |             |                        |                    | GCT            |                  |                    | GCT             | 0.943            | 0.982              |
|                             |                        |                    | GGA            |                  |                    | GGA             | 1.229                 | 1.278              |             |                        |                    | GGA            |                  |                        | GGA             | 1.235            | 1.256              |             |                        |                    | GGA            |                  |                    | GGA             | 0.996            | 1.017              |
|                             |                        |                    | GGC            |                  |                    | GGC             | 1.265                 | 1.166              |             |                        |                    | GGC            |                  |                        | GGC             | 1.348            | 1.298              |             |                        |                    | GGC            |                  |                    | GGC             | 0.938            | 0.898              |

Table S1. Mono-, di-, and tri-nucleotides frequency and observed/expected ratio for both complete promoter set (CPS) and repeat-filtered promoter set (REFPS).

|     |       |       |
|-----|-------|-------|
| GCG | 1.518 | 1.319 |
| GCT | 0.834 | 0.798 |
| GTA | 0.551 | 0.539 |
| GTC | 0.705 | 0.685 |
| GTG | 0.992 | 0.957 |
| GTT | 0.808 | 0.785 |
| TAA | 0.961 | 0.970 |
| TAC | 0.551 | 0.535 |
| TAG | 0.654 | 0.604 |
| TAT | 0.796 | 0.768 |
| TCA | 1.022 | 1.013 |
| TCC | 1.250 | 1.223 |
| TCG | 0.377 | 0.431 |
| TCT | 1.269 | 1.310 |
| TGA | 1.023 | 1.060 |
| TGC | 0.944 | 0.971 |
| TGG | 1.226 | 1.175 |
| TGT | 1.024 | 1.022 |
| TTA | 0.959 | 0.945 |
| TTC | 1.140 | 1.167 |
| TTG | 0.979 | 0.955 |
| TTT | 1.911 | 1.922 |

|     |       |       |
|-----|-------|-------|
| GCG | 1.561 | 1.506 |
| GCT | 0.876 | 0.889 |
| GTA | 0.572 | 0.585 |
| GTC | 0.727 | 0.732 |
| GTG | 1.124 | 1.130 |
| GTT | 0.792 | 0.785 |
| TAA | 0.863 | 0.851 |
| TAC | 0.571 | 0.574 |
| TAG | 0.666 | 0.647 |
| TAT | 0.794 | 0.777 |
| TCA | 1.077 | 1.085 |
| TCC | 1.228 | 1.252 |
| TCG | 0.255 | 0.255 |
| TCT | 1.250 | 1.278 |
| TGA | 1.079 | 1.086 |
| TGC | 1.073 | 1.087 |
| TGG | 1.375 | 1.374 |
| TGT | 1.104 | 1.097 |
| TTA | 0.865 | 0.849 |
| TTC | 1.104 | 1.120 |
| TTG | 1.001 | 0.995 |
| TTT | 1.653 | 1.624 |

|     |       |       |
|-----|-------|-------|
| GCG | 0.972 | 0.876 |
| GCT | 0.951 | 0.898 |
| GTA | 0.963 | 0.921 |
| GTC | 0.970 | 0.936 |
| GTG | 0.882 | 0.847 |
| GTT | 1.021 | 1.000 |
| TAA | 1.113 | 1.140 |
| TAC | 0.963 | 0.932 |
| TAG | 0.983 | 0.934 |
| TAT | 1.002 | 0.988 |
| TCA | 0.949 | 0.933 |
| TCC | 1.018 | 0.977 |
| TCG | 1.478 | 1.690 |
| TCT | 1.015 | 1.025 |
| TGA | 0.948 | 0.977 |
| TGC | 0.880 | 0.893 |
| TGG | 0.892 | 0.855 |
| TGT | 0.928 | 0.932 |
| TTA | 1.108 | 1.113 |
| TTC | 1.032 | 1.042 |
| TTG | 0.979 | 0.960 |
| TTT | 1.156 | 1.183 |

Table S1. Mono-, di-, and tri-nucleotides frequency and observed/expected ratio for both complete promoter set (CPS) and repeat-filtered promoter set (REFPS).

Obs/Exp (di) = observed to expected ration of dinucleotides. Expected number is estimated form the assumption of independent nucleotide distribution

Obs/Exp (tri) = observed to expected ration of trinucleotides. Expected number is estimated form the assumption of independent nucleotide distribution

Upstream region = [-1000..0]

Downstream regions = [0..1000]

| Repeat-filtered promoter set (REFPS) |                        |                    |                |                  |                    |                 |                       |                    |             |                        |                    |                |                  |                        |                 |                  |                    |             |                        |                    |                |                  |                    |                 |                  |                    |
|--------------------------------------|------------------------|--------------------|----------------|------------------|--------------------|-----------------|-----------------------|--------------------|-------------|------------------------|--------------------|----------------|------------------|------------------------|-----------------|------------------|--------------------|-------------|------------------------|--------------------|----------------|------------------|--------------------|-----------------|------------------|--------------------|
| Protein-coding genes                 |                        |                    |                |                  |                    |                 | Long non-coding genes |                    |             |                        |                    |                |                  | Coding/noncoding ratio |                 |                  |                    |             |                        |                    |                |                  |                    |                 |                  |                    |
| Nucleotides                          | Nucleotide probability |                    | Di-nucleotides | Obs/Exp (di)     |                    | Tri-nucleotides | Obs/Exp (tri)         |                    | Nucleotides | Nucleotide probability |                    | Di-nucleotides | Obs/Exp (di)     |                        | Tri-nucleotides | Obs/Exp (tri)    |                    | Nucleotides | Nucleotide probability |                    | Di-nucleotides | Obs/Exp (di)     |                    | Tri-nucleotides | Obs/Exp (tri)    |                    |
|                                      | Up-stream region       | Down-stream region |                | Up-stream region | Down-stream region |                 | Up-stream region      | Down-stream region |             | Up-stream region       | Down-stream region |                | Up-stream region | Down-stream region     |                 | Up-stream region | Down-stream region |             | Up-stream region       | Down-stream region |                | Up-stream region | Down-stream region |                 | Up-stream region | Down-stream region |
| A                                    | 0.253                  | 0.221              | AA             | 1.197            | 1.197              | AAA             | 1.750                 | 1.749              | A           | 0.271                  | 0.269              | AA             | 1.144            | 1.134                  | AAA             | 1.574            | 1.521              | A           | 0.935                  | 0.821              | AA             | 1.046            | 1.056              | AAA             | 1.112            | 1.150              |
| C                                    | 0.250                  | 0.257              | AC             | 0.790            | 0.780              | AAC             | 0.817                 | 0.830              | C           | 0.232                  | 0.229              | AC             | 0.810            | 0.810                  | AAC             | 0.805            | 0.808              | C           | 1.081                  | 1.122              | AC             | 0.975            | 0.962              | AAC             | 1.015            | 1.027              |
| G                                    | 0.247                  | 0.280              | AG             | 1.174            | 1.194              | AAG             | 1.164                 | 1.244              | G           | 0.229                  | 0.234              | AG             | 1.185            | 1.196                  | AAG             | 1.144            | 1.180              | G           | 1.079                  | 1.195              | AG             | 0.991            | 0.999              | AAG             | 1.018            | 1.054              |
| T                                    | 0.250                  | 0.242              | AT             | 0.836            | 0.825              | AAT             | 1.048                 | 1.024              | T           | 0.269                  | 0.268              | AT             | 0.858            | 0.853                  | AAT             | 1.000            | 0.978              | T           | 0.928                  | 0.904              | AT             | 0.975            | 0.967              | AAT             | 1.048            | 1.048              |
|                                      |                        |                    | CA             | 1.098            | 1.084              | ACA             | 1.012                 | 0.994              |             |                        |                    | CA             | 1.183            | 1.187                  | ACA             | 1.093            | 1.094              |             |                        |                    | CA             | 0.928            | 0.913              | ACA             | 0.925            | 0.909              |
|                                      |                        |                    | CC             | 1.217            | 1.213              | ACC             | 0.863                 | 0.901              |             |                        |                    | CC             | 1.230            | 1.234                  | ACC             | 0.904            | 0.913              |             |                        |                    | CC             | 0.989            | 0.983              | ACC             | 0.954            | 0.987              |
|                                      |                        |                    | CG             | 0.498            | 0.550              | ACG             | 0.356                 | 0.371              |             |                        |                    | CG             | 0.329            | 0.325                  | ACG             | 0.260            | 0.261              |             |                        |                    | CG             | 1.511            | 1.695              | ACG             | 1.370            | 1.423              |
|                                      |                        |                    | CT             | 1.173            | 1.214              | ACT             | 0.919                 | 0.925              |             |                        |                    | CT             | 1.183            | 1.199                  | ACT             | 0.909            | 0.916              |             |                        |                    | CT             | 0.991            | 1.012              | ACT             | 1.011            | 1.010              |
|                                      |                        |                    | GA             | 0.973            | 1.028              | AGA             | 1.239                 | 1.357              |             |                        |                    | GA             | 0.976            | 0.994                  | AGA             | 1.250            | 1.285              |             |                        |                    | GA             | 0.997            | 1.035              | AGA             | 0.991            | 1.056              |
|                                      |                        |                    | GC             | 1.009            | 0.992              | AGC             | 1.103                 | 1.117              |             |                        |                    | GC             | 1.010            | 0.999                  | AGC             | 1.148            | 1.148              |             |                        |                    | GC             | 0.999            | 0.993              | AGC             | 0.960            | 0.973              |
|                                      |                        |                    | GG             | 1.226            | 1.170              | AGG             | 1.439                 | 1.364              |             |                        |                    | GG             | 1.240            | 1.226                  | AGG             | 1.471            | 1.471              |             |                        |                    | GG             | 0.989            | 0.954              | AGG             | 0.979            | 0.927              |
|                                      |                        |                    | GT             | 0.791            | 0.783              | AGT             | 0.914                 | 0.927              |             |                        |                    | GT             | 0.807            | 0.806                  | AGT             | 0.904            | 0.903              |             |                        |                    | GT             | 0.980            | 0.972              | AGT             | 1.012            | 1.027              |
|                                      |                        |                    | TA             | 0.724            | 0.691              | ATA             | 0.729                 | 0.694              |             |                        |                    | TA             | 0.713            | 0.707                  | ATA             | 0.734            | 0.716              |             |                        |                    | TA             | 1.015            | 0.977              | ATA             | 0.994            | 0.969              |
|                                      |                        |                    | TC             | 0.982            | 0.981              | ATC             | 0.706                 | 0.726              |             |                        |                    | TC             | 0.980            | 0.987                  | ATC             | 0.724            | 0.731              |             |                        |                    | TC             | 1.001            | 0.994              | ATC             | 0.975            | 0.993              |
|                                      |                        |                    | TG             | 1.101            | 1.100              | ATG             | 0.855                 | 0.844              |             |                        |                    | TG             | 1.184            | 1.179                  | ATG             | 0.972            | 0.971              |             |                        |                    | TG             | 0.930            | 0.932              | ATG             | 0.880            | 0.870              |
|                                      |                        |                    | TT             | 1.195            | 1.181              | ATT             | 1.054                 | 1.022              |             |                        |                    | TT             | 1.146            | 1.144                  | ATT             | 0.997            | 0.987              |             |                        |                    | TT             | 1.043            | 1.033              | ATT             | 1.057            | 1.036              |
|                                      |                        |                    |                |                  |                    | CAA             | 1.003                 | 0.971              |             |                        |                    |                |                  |                        | CAA             | 1.032            | 1.023              |             |                        |                    |                |                  |                    | CAA             | 0.972            | 0.949              |
|                                      |                        |                    |                |                  |                    | CAC             | 1.034                 | 0.947              |             |                        |                    |                |                  |                        | CAC             | 1.148            | 1.133              |             |                        |                    |                |                  |                    | CAC             | 0.900            | 0.836              |
|                                      |                        |                    |                |                  |                    | CAG             | 1.513                 | 1.485              |             |                        |                    |                |                  |                        | CAG             | 1.655            | 1.672              |             |                        |                    |                |                  |                    | CAG             | 0.914            | 0.888              |
|                                      |                        |                    |                |                  |                    | CAT             | 0.846                 | 0.865              |             |                        |                    |                |                  |                        | CAT             | 0.961            | 0.969              |             |                        |                    |                |                  |                    | CAT             | 0.880            | 0.893              |
|                                      |                        |                    |                |                  |                    | CCA             | 1.309                 | 1.299              |             |                        |                    |                |                  |                        | CCA             | 1.439            | 1.456              |             |                        |                    |                |                  |                    | CCA             | 0.909            | 0.892              |
|                                      |                        |                    |                |                  |                    | CCC             | 1.467                 | 1.447              |             |                        |                    |                |                  |                        | CCC             | 1.499            | 1.500              |             |                        |                    |                |                  |                    | CCC             | 0.979            | 0.965              |
|                                      |                        |                    |                |                  |                    | CCG             | 0.650                 | 0.713              |             |                        |                    |                |                  |                        | CCG             | 0.454            | 0.442              |             |                        |                    |                |                  |                    | CCG             | 1.434            | 1.612              |
|                                      |                        |                    |                |                  |                    | CCT             | 1.424                 | 1.461              |             |                        |                    |                |                  |                        | CCT             | 1.444            | 1.473              |             |                        |                    |                |                  |                    | CCT             | 0.987            | 0.992              |
|                                      |                        |                    |                |                  |                    | CGA             | 0.346                 | 0.404              |             |                        |                    |                |                  |                        | CGA             | 0.229            | 0.233              |             |                        |                    |                |                  |                    | CGA             | 1.512            | 1.732              |
|                                      |                        |                    |                |                  |                    | CGC             | 0.654                 | 0.660              |             |                        |                    |                |                  |                        | CGC             | 0.410            | 0.387              |             |                        |                    |                |                  |                    | CGC             | 1.595            | 1.702              |
|                                      |                        |                    |                |                  |                    | CGG             | 0.645                 | 0.716              |             |                        |                    |                |                  |                        | CGG             | 0.450            | 0.442              |             |                        |                    |                |                  |                    | CGG             | 1.434            | 1.619              |
|                                      |                        |                    |                |                  |                    | CGT             | 0.346                 | 0.374              |             |                        |                    |                |                  |                        | CGT             | 0.256            | 0.259              |             |                        |                    |                |                  |                    | CGT             | 1.347            | 1.445              |
|                                      |                        |                    |                |                  |                    | CTA             | 0.687                 | 0.656              |             |                        |                    |                |                  |                        | CTA             | 0.682            | 0.674              |             |                        |                    |                |                  |                    | CTA             | 1.007            | 0.974              |
|                                      |                        |                    |                |                  |                    | CTC             | 1.348                 | 1.315              |             |                        |                    |                |                  |                        | CTC             | 1.353            | 1.367              |             |                        |                    |                |                  |                    | CTC             | 0.996            | 0.962              |
|                                      |                        |                    |                |                  |                    | CTG             | 1.504                 | 1.540              |             |                        |                    |                |                  |                        | CTG             | 1.655            | 1.669              |             |                        |                    |                |                  |                    | CTG             | 0.909            | 0.923              |
|                                      |                        |                    |                |                  |                    | CTT             | 1.156                 | 1.231              |             |                        |                    |                |                  |                        | CTT             | 1.135            | 1.167              |             |                        |                    |                |                  |                    | CTT             | 1.019            | 1.055              |
|                                      |                        |                    |                |                  |                    | GAA             | 1.121                 | 1.225              |             |                        |                    |                |                  |                        | GAA             | 1.105            | 1.136              |             |                        |                    |                |                  |                    | GAA             | 1.014            | 1.079              |
|                                      |                        |                    |                |                  |                    | GAC             | 0.729                 | 0.776              |             |                        |                    |                |                  |                        | GAC             | 0.746            | 0.762              |             |                        |                    |                |                  |                    | GAC             | 0.977            | 1.019              |
|                                      |                        |                    |                |                  |                    | GAG             | 1.334                 | 1.370              |             |                        |                    |                |                  |                        | GAG             | 1.350            | 1.359              |             |                        |                    |                |                  |                    | GAG             | 0.988            | 1.008              |
|                                      |                        |                    |                |                  |                    | GAT             | 0.709                 | 0.718              |             |                        |                    |                |                  |                        | GAT             | 0.724            | 0.726              |             |                        |                    |                |                  |                    | GAT             | 0.980            | 0.988              |
|                                      |                        |                    |                |                  |                    | GCA             | 1.011                 | 0.981              |             |                        |                    |                |                  |                        | GCA             | 1.113            | 1.113              |             |                        |                    |                |                  |                    | GCA             | 0.908            | 0.882              |
|                                      |                        |                    |                |                  |                    | GCC             | 1.282                 | 1.207              |             |                        |                    |                |                  |                        | GCC             | 1.327            | 1.309              |             |                        |                    |                |                  |                    | GCC             | 0.966            | 0.922              |
|                                      |                        |                    |                |                  |                    | GCG             | 0.641                 | 0.675              |             |                        |                    |                |                  |                        | GCG             | 0.399            | 0.387              |             |                        |                    |                |                  |                    | GCG             | 1.606            | 1.744              |
|                                      |                        |                    |                |                  |                    | GCT             | 1.090                 | 1.136              |             |                        |                    |                |                  |                        | GCT             | 1.148            | 1.152              |             |                        |                    |                |                  |                    | GCT             | 0.950            | 0.986              |
|                                      |                        |                    |                |                  |                    | GGA             | 1.244                 | 1.294              |             |                        |                    |                |                  |                        | GGA             | 1.248            | 1.265              |             |                        |                    |                |                  |                    | GGA             | 0.996            | 1.023              |
|                                      |                        |                    |                |                  |                    | GGC             | 1.279                 | 1.177              |             |                        |                    |                |                  |                        | GGC             | 1.330            | 1.290              |             |                        |                    |                |                  |                    | GGC             | 0.961            | 0.912              |
|                                      |                        |                    |                |                  |                    | GGG             | 1.495                 | 1.341              |             |                        |                    |                |                  |                        | GGG             | 1.524            | 1.474              |             |                        |                    |                |                  |                    | GGG             | 0.981            | 0.910              |

Table S1. Mono-, di-, and tri-nucleotides frequency and observed/expected ratio for both complete promoter set (CPS) and repeat-filtered promoter set (REFPS).

|     |       |       |
|-----|-------|-------|
| GGT | 0.882 | 0.846 |
| GTA | 0.577 | 0.561 |
| GTC | 0.734 | 0.718 |
| GTG | 1.033 | 1.004 |
| GTT | 0.822 | 0.796 |
| TAA | 0.900 | 0.897 |
| TAC | 0.576 | 0.556 |
| TAG | 0.681 | 0.628 |
| TAT | 0.733 | 0.715 |
| TCA | 1.056 | 1.054 |
| TCC | 1.256 | 1.252 |
| TCG | 0.344 | 0.395 |
| TCT | 1.254 | 1.300 |
| TGA | 1.063 | 1.080 |
| TGC | 1.001 | 1.011 |
| TGG | 1.321 | 1.270 |
| TGT | 1.019 | 1.010 |
| TTA | 0.897 | 0.875 |
| TTC | 1.134 | 1.161 |
| TTG | 1.008 | 0.973 |
| TTT | 1.741 | 1.717 |

|     |       |       |
|-----|-------|-------|
| GGT | 0.906 | 0.909 |
| GTA | 0.576 | 0.587 |
| GTC | 0.747 | 0.748 |
| GTG | 1.141 | 1.124 |
| GTT | 0.804 | 0.794 |
| TAA | 0.836 | 0.833 |
| TAC | 0.576 | 0.576 |
| TAG | 0.678 | 0.655 |
| TAT | 0.736 | 0.736 |
| TCA | 1.109 | 1.111 |
| TCC | 1.240 | 1.260 |
| TCG | 0.231 | 0.232 |
| TCT | 1.259 | 1.287 |
| TGA | 1.110 | 1.110 |
| TGC | 1.112 | 1.114 |
| TGG | 1.442 | 1.427 |
| TGT | 1.096 | 1.083 |
| TTA | 0.833 | 0.830 |
| TTC | 1.111 | 1.126 |
| TTG | 1.023 | 1.013 |
| TTT | 1.593 | 1.585 |

|     |       |       |
|-----|-------|-------|
| GGT | 0.974 | 0.931 |
| GTA | 1.001 | 0.955 |
| GTC | 0.983 | 0.961 |
| GTG | 0.905 | 0.893 |
| GTT | 1.023 | 1.003 |
| TAA | 1.077 | 1.077 |
| TAC | 1.001 | 0.965 |
| TAG | 1.005 | 0.959 |
| TAT | 0.996 | 0.973 |
| TCA | 0.952 | 0.949 |
| TCC | 1.013 | 0.994 |
| TCG | 1.488 | 1.699 |
| TCT | 0.996 | 1.010 |
| TGA | 0.957 | 0.973 |
| TGC | 0.900 | 0.908 |
| TGG | 0.916 | 0.890 |
| TGT | 0.930 | 0.932 |
| TTA | 1.077 | 1.055 |
| TTC | 1.021 | 1.031 |
| TTG | 0.985 | 0.961 |
| TTT | 1.093 | 1.083 |
